# Supplementary material for: Insights into Australian Bat Lyssavirus in Insectivorous Bats of Western Australia
Source: PubMed Central journal article supplement (PMC6473685; doi:10.3390/tropicalmed4010046), 2019-03-11
Supplement: tropicalmed-04-00046-s001.pdf [file tropicalmed-04-00046-s001.pdf]

**Table S1.** Median Fluorescence Intensity (MFI) values obtained from the bead based Lumines assay. Samples from the first season were pooled one in three or one in four. Therefore the MFI value represents an aggregate estimate for those samples. Samples above 1000 MFI are shown in bold.

| Season | Bioregion                       | Species              |                      |                        | MFI                   |     |
|--------|---------------------------------|----------------------|----------------------|------------------------|-----------------------|-----|
| 1      | Avon Wheatbealt                 | Chalinolobus gouldii | Chalinolobus gouldii | Chalinolobus gouldii   | 84                    |     |
| 1      | Avon Wheatbealt                 | Chalinolobus gouldii | Chalinolobus gouldii | Chalinolobus gouldii   | 91                    |     |
| 1      | Avon Wheatbealt                 | Chalinolobus gouldii | Chalinolobus gouldii | Chalinolobus gouldii   | 93                    |     |
| 1      | Avon Wheatbealt                 | Chalinolobus gouldii | Chalinolobus gouldii | Chalinolobus gouldii   | 95                    |     |
| 1      | Avon Wheatbealt                 | Chalinolobus gouldii | Chalinolobus gouldii | Chalinolobus gouldii   | 98                    |     |
| 1      | Avon Wheatbealt                 | Chalinolobus gouldii | Chalinolobus gouldii | Chalinolobus gouldii   | 104                   |     |
| 1      | Avon Wheatbealt                 | Chalinolobus gouldii | Chalinolobus gouldii | Chalinolobus gouldii   | 107                   |     |
| 1      | Avon Wheatbealt                 | Chalinolobus gouldii | Chalinolobus gouldii | Chalinolobus gouldii   | 107                   |     |
| 1      | Avon Wheatbealt                 | Chalinolobus gouldii | Chalinolobus gouldii | Chalinolobus gouldii   | 129                   |     |
| 1      | Avon Wheatbealt                 | Chalinolobus gouldii | Chalinolobus gouldii | Chalinolobus gouldii   | 150                   |     |
| 1      | Avon Wheatbealt                 | Chalinolobus gouldii | Chalinolobus gouldii | Chalinolobus gouldii   | 161                   |     |
| 1      | Avon Wheatbealt                 | Chalinolobus gouldii | Chalinolobus gouldii | Chalinolobus gouldii   | 169                   |     |
| 1      | Avon Wheatbealt                 | Chalinolobus gouldii | Chalinolobus gouldii | Chalinolobus morio     | 77                    |     |
| 1      | Avon Wheatbealt                 | Chalinolobus gouldii | Chalinolobus gouldii | Chalinolobus morio     | 96                    |     |
| 1      | Avon Wheatbealt                 | Chalinolobus gouldii | Chalinolobus gouldii | Chalinolobus morio     | 99                    |     |
| 1      | Avon Wheatbealt                 | Chalinolobus gouldii | Chalinolobus gouldii | Chalinolobus morio     | 123                   |     |
| 1      | Avon Wheatbealt                 | Chalinolobus gouldii | Chalinolobus gouldii | Nyctophilus geoffroyi  | 74                    |     |
| 1      | Avon Wheatbealt                 | Chalinolobus gouldii | Chalinolobus gouldii | Nyctophilus geoffroyi  | 76                    |     |
| 1      | Avon Wheatbealt                 | Chalinolobus gouldii | Chalinolobus gouldii | Nyctophilus geoffroyi  | 80                    |     |
| 1      | Avon Wheatbealt                 | Chalinolobus gouldii | Chalinolobus gouldii | Nyctophilus geoffroyi  | 86                    |     |
| 1      | Avon Wheatbealt                 | Chalinolobus gouldii | Chalinolobus gouldii | Nyctophilus geoffroyi  | 88                    |     |
| 1      | Avon Wheatbealt                 | Chalinolobus gouldii | Chalinolobus gouldii | Nyctophilus geoffroyi  | 91                    |     |
| 1      | Avon Wheatbealt                 | Chalinolobus gouldii | Chalinolobus gouldii | Nyctophilus geoffroyi  | 91                    |     |
| 1      | Avon Wheatbealt                 | Chalinolobus gouldii | Chalinolobus gouldii | Nyctophilus geoffroyi  | 94                    |     |
| 1      | Avon Wheatbealt                 | Chalinolobus gouldii | Chalinolobus gouldii | Nyctophilus geoffroyi  | 96                    |     |
| 1      | Avon Wheatbealt                 | Chalinolobus gouldii | Chalinolobus gouldii | Nyctophilus geoffroyi  | 97                    |     |
| 1      | Avon Wheatbealt                 | Chalinolobus gouldii | Chalinolobus gouldii | Nyctophilus geoffroyi  | 102                   |     |
| 1      | Avon Wheatbealt                 | Chalinolobus gouldii | Chalinolobus gouldii | Nyctophilus geoffroyi  | 104                   |     |
| 1      | Avon Wheatbealt                 | Chalinolobus gouldii | Chalinolobus gouldii | Nyctophilus geoffroyi  | 105                   |     |
| 1      | Avon Wheatbealt                 | Chalinolobus gouldii | Chalinolobus gouldii | Nyctophilus geoffroyi  | 108                   |     |
| 1      | Avon Wheatbealt                 | Chalinolobus gouldii | Chalinolobus gouldii | Nyctophilus geoffroyi  | 125                   |     |
| 1      | Avon Wheatbealt                 | Chalinolobus gouldii | Chalinolobus gouldii | Nyctophilus geoffroyi  | 130                   |     |
| 1      | Avon Wheatbealt                 | Chalinolobus gouldii | Chalinolobus gouldii | Nyctophilus geoffroyi  | 132                   |     |
| 1      | Avon Wheatbealt                 | Chalinolobus gouldii | Chalinolobus gouldii | Nyctophilus major      | 127                   |     |
| 1      | Avon Wheatbealt                 | Chalinolobus gouldii | Chalinolobus gouldii | Nyctophilus sp         | 105                   |     |
| 1      | Avon Wheatbealt                 | Chalinolobus gouldii | Chalinolobus gouldii | Ozimops sp             | 108                   |     |
| 1      | Avon Wheatbealt                 | Chalinolobus gouldii | Chalinolobus gouldii | Ozimops sp             | 120                   |     |
| 1      | Avon Wheatbealt                 | Chalinolobus gouldii | Chalinolobus gouldii | Scotorepens balstoni   | 0                     |     |
| 1      | Avon Wheatbealt                 | Chalinolobus gouldii | Chalinolobus gouldii | Scotorepens balstoni   | 83                    |     |
| 1      | Avon Wheatbealt                 | Chalinolobus gouldii | Chalinolobus gouldii | Scotorepens balstoni   | 95                    |     |
| 1      | Avon Wheatbealt                 | Chalinolobus gouldii | Chalinolobus gouldii | Scotorepens balstoni   | 98                    |     |
| 1      | Avon Wheatbealt                 | Chalinolobus gouldii | Chalinolobus gouldii | Scotorepens balstoni   | 105                   |     |
| 1      | Avon Wheatbealt                 | Chalinolobus gouldii | Chalinolobus gouldii | Scotorepens balstoni   | 107                   |     |
| 1      | Avon Wheatbealt                 | Chalinolobus gouldii | Chalinolobus gouldii | Scotorepens balstoni   | 112                   |     |
| 1      | Avon Wheatbealt                 | Chalinolobus gouldii | Chalinolobus gouldii | Scotorepens balstoni   | 133                   |     |
| 1      | Avon Wheatbealt                 | Chalinolobus gouldii | Chalinolobus gouldii | Vespadelus baverstocki | 81                    |     |
| 1      | Avon Wheatbealt                 | Chalinolobus gouldii | Chalinolobus gouldii | Vespadelus baverstocki | 106                   |     |
| 1      | Avon Wheatbealt                 | Chalinolobus gouldii | Chalinolobus gouldii | Vespadelus baverstocki | 108                   |     |
| 1      | Avon Wheatbealt                 | Chalinolobus gouldii | Chalinolobus gouldii | Vespadelus baverstocki | 174                   |     |
| 1      | Avon Wheatbealt                 | Chalinolobus gouldii | Chalinolobus gouldii | Vespadelus baverstocki | 243                   |     |
| 1      | Avon Wheatbealt / Jarrah Forest | Chalinolobus gouldii | Chalinolobus gouldii | Chalinolobus gouldii*  | Chalinolobus gouldii* | 108 |
| 1      | Avon Wheatbealt / Jarrah Forest | Chalinolobus gouldii | Chalinolobus gouldii | Chalinolobus gouldii*  | Chalinolobus gouldii* | 109 |
| 1      | Avon Wheatbealt / Jarrah Forest | Chalinolobus gouldii | Chalinolobus gouldii | Chalinolobus gouldii*  | Chalinolobus gouldii* | 136 |
| 1      | Avon Wheatbealt / Jarrah Forest | Chalinolobus gouldii | Chalinolobus gouldii | Chalinolobus gouldii*  |                       | 75  |
| 1      | Avon Wheatbealt / Jarrah Forest | Chalinolobus gouldii | Chalinolobus gouldii | Chalinolobus gouldii*  |                       | 85  |
| 1      | Avon Wheatbealt / Jarrah Forest | Chalinolobus gouldii | Chalinolobus gouldii | Chalinolobus gouldii*  |                       | 97  |
| 1      | Avon Wheatbealt / Jarrah Forest | Chalinolobus gouldii | Chalinolobus gouldii | Chalinolobus gouldii*  |                       | 105 |
| 1      | Avon Wheatbealt / Jarrah Forest | Chalinolobus gouldii | Chalinolobus gouldii | Chalinolobus gouldii*  |                       | 115 |
| 1      | Avon Wheatbealt / Jarrah Forest | Chalinolobus gouldii | Chalinolobus gouldii | Chalinolobus gouldii*  |                       | 120 |
| 1      | Avon Wheatbealt / Jarrah Forest | Chalinolobus gouldii | Chalinolobus gouldii | Chalinolobus morio*    |                       | 196 |
| 1      | Avon Wheatbealt / Jarrah Forest | Chalinolobus gouldii | Chalinolobus gouldii | Nyctophilus geoffroyi* |                       | 76  |
| 1      | Avon Wheatbealt / Jarrah Forest | Chalinolobus gouldii | Chalinolobus gouldii | Nyctophilus geoffroyi* |                       | 80  |
| 1      | Avon Wheatbealt / Jarrah Forest | Chalinolobus gouldii | Chalinolobus gouldii | Nyctophilus geoffroyi* |                       | 89  |
| 1      | Avon Wheatbealt / Jarrah Forest | Chalinolobus gouldii | Chalinolobus gouldii | Nyctophilus geoffroyi* |                       | 107 |



|   |                  |                       |              |
|---|------------------|-----------------------|--------------|
| 2 | Avon Wheatbelt   | Nyctophilus geoffroyi | 330          |
| 2 | Avon Wheatbelt   | Nyctophilus geoffroyi | 363          |
| 2 | Avon Wheatbelt   | Nyctophilus geoffroyi | 366          |
| 2 | Avon Wheatbelt   | Nyctophilus geoffroyi | 368          |
| 2 | Avon Wheatbelt   | Nyctophilus geoffroyi | 403          |
| 2 | Avon Wheatbelt   | Ozimops sp            | 245          |
| 2 | Esperance Plains | Chalinolobus gouldii  | 333          |
| 2 | Esperance Plains | Chalinolobus gouldii  | 482          |
| 2 | Esperance Plains | Chalinolobus morio    | 87           |
| 2 | Esperance Plains | Chalinolobus morio    | 120          |
| 2 | Esperance Plains | Chalinolobus morio    | 163          |
| 2 | Esperance Plains | Chalinolobus morio    | 234          |
| 2 | Esperance Plains | Chalinolobus morio    | 311          |
| 2 | Esperance Plains | Nyctophilus geoffroyi | 357          |
| 2 | Esperance Plains | Nyctophilus sp        | NA           |
| 2 | Esperance Plains | Vespadelus regulus    | 77           |
| 2 | Esperance Plains | Vespadelus regulus    | 146          |
| 2 | Esperance Plains | Vespadelus regulus    | 152          |
| 2 | Esperance Plains | Vespadelus regulus    | 170          |
| 2 | Esperance Plains | Vespadelus regulus    | 225          |
| 2 | Esperance Plains | Vespadelus regulus    | 285          |
| 2 | Esperance Plains | Vespadelus regulus    | 288          |
| 2 | Esperance Plains | Vespadelus regulus    | 387          |
| 2 | Esperance Plains | Vespadelus regulus    | NA           |
| 2 | Esperance Plains | Vespadelus regulus    | NA           |
| 2 | Esperance Plains | Vespadelus regulus    | NA           |
| 2 | Jarrah Forest    | Chalinolobus gouldii  | 102          |
| 2 | Jarrah Forest    | Chalinolobus gouldii  | 150          |
| 2 | Jarrah Forest    | Chalinolobus gouldii  | 189          |
| 2 | Jarrah Forest    | Chalinolobus gouldii  | 200          |
| 2 | Jarrah Forest    | Chalinolobus gouldii  | 204          |
| 2 | Jarrah Forest    | Chalinolobus gouldii  | 217          |
| 2 | Jarrah Forest    | Chalinolobus gouldii  | 219          |
| 2 | Jarrah Forest    | Chalinolobus gouldii  | 230          |
| 2 | Jarrah Forest    | Chalinolobus gouldii  | 236          |
| 2 | Jarrah Forest    | Chalinolobus gouldii  | 240          |
| 2 | Jarrah Forest    | Chalinolobus gouldii  | 248          |
| 2 | Jarrah Forest    | Chalinolobus gouldii  | 264          |
| 2 | Jarrah Forest    | Chalinolobus gouldii  | 280          |
| 2 | Jarrah Forest    | Chalinolobus gouldii  | 313          |
| 2 | Jarrah Forest    | Chalinolobus gouldii  | 316          |
| 2 | Jarrah Forest    | Chalinolobus gouldii  | 317          |
| 2 | Jarrah Forest    | Chalinolobus gouldii  | 339          |
| 2 | Jarrah Forest    | Chalinolobus gouldii  | 345          |
| 2 | Jarrah Forest    | Chalinolobus gouldii  | 349          |
| 2 | Jarrah Forest    | Chalinolobus gouldii  | 349          |
| 2 | Jarrah Forest    | Chalinolobus gouldii  | 360          |
| 2 | Jarrah Forest    | Chalinolobus gouldii  | 360          |
| 2 | Jarrah Forest    | Chalinolobus gouldii  | 373          |
| 2 | Jarrah Forest    | Chalinolobus gouldii  | 416          |
| 2 | Jarrah Forest    | Chalinolobus gouldii  | 421          |
| 2 | Jarrah Forest    | Chalinolobus gouldii  | 479          |
| 2 | Jarrah Forest    | Chalinolobus gouldii  | 645          |
| 2 | Jarrah Forest    | Chalinolobus gouldii  | 711          |
| 2 | Jarrah Forest    | Chalinolobus gouldii  | <b>1981</b>  |
| 2 | Jarrah Forest    | Chalinolobus gouldii  | <b>23352</b> |
| 2 | Jarrah Forest    | Chalinolobus morio    | 99           |
| 2 | Jarrah Forest    | Chalinolobus morio    | 100          |
| 2 | Jarrah Forest    | Chalinolobus morio    | 104          |
| 2 | Jarrah Forest    | Chalinolobus morio    | 121          |
| 2 | Jarrah Forest    | Chalinolobus morio    | 122          |
| 2 | Jarrah Forest    | Chalinolobus morio    | 124          |
| 2 | Jarrah Forest    | Chalinolobus morio    | 125          |
| 2 | Jarrah Forest    | Chalinolobus morio    | 130          |
| 2 | Jarrah Forest    | Chalinolobus morio    | 130          |
| 2 | Jarrah Forest    | Chalinolobus morio    | 141          |
| 2 | Jarrah Forest    | Chalinolobus morio    | 152          |

|   |               |                          |             |
|---|---------------|--------------------------|-------------|
| 2 | Jarrah Forest | Chalinolobus morio       | 153         |
| 2 | Jarrah Forest | Chalinolobus morio       | 185         |
| 2 | Jarrah Forest | Chalinolobus morio       | 227         |
| 2 | Jarrah Forest | Chalinolobus morio       | 230         |
| 2 | Jarrah Forest | Chalinolobus morio       | 235         |
| 2 | Jarrah Forest | Chalinolobus morio       | 238         |
| 2 | Jarrah Forest | Chalinolobus morio       | 245         |
| 2 | Jarrah Forest | Chalinolobus morio       | 247         |
| 2 | Jarrah Forest | Chalinolobus morio       | 255         |
| 2 | Jarrah Forest | Chalinolobus morio       | 256         |
| 2 | Jarrah Forest | Chalinolobus morio       | 308         |
| 2 | Jarrah Forest | Chalinolobus morio       | 310         |
| 2 | Jarrah Forest | Chalinolobus morio       | 317         |
| 2 | Jarrah Forest | Chalinolobus morio       | 327         |
| 2 | Jarrah Forest | Chalinolobus morio       | 342         |
| 2 | Jarrah Forest | Chalinolobus morio       | 355         |
| 2 | Jarrah Forest | Chalinolobus morio       | 409         |
| 2 | Jarrah Forest | Chalinolobus morio       | 449         |
| 2 | Jarrah Forest | Chalinolobus morio       | 472         |
| 2 | Jarrah Forest | Chalinolobus morio       | 683         |
| 2 | Jarrah Forest | Falsistrellus mackenziei | 116         |
| 2 | Jarrah Forest | Falsistrellus mackenziei | 127         |
| 2 | Jarrah Forest | Falsistrellus mackenziei | 152         |
| 2 | Jarrah Forest | Falsistrellus mackenziei | 164         |
| 2 | Jarrah Forest | Falsistrellus mackenziei | 177         |
| 2 | Jarrah Forest | Falsistrellus mackenziei | <b>1959</b> |
| 2 | Jarrah Forest | Nyctophilus geoffroyi    | 119         |
| 2 | Jarrah Forest | Nyctophilus geoffroyi    | 200         |
| 2 | Jarrah Forest | Nyctophilus geoffroyi    | 219         |
| 2 | Jarrah Forest | Nyctophilus geoffroyi    | 221         |
| 2 | Jarrah Forest | Nyctophilus geoffroyi    | 278         |
| 2 | Jarrah Forest | Nyctophilus geoffroyi    | 325         |
| 2 | Jarrah Forest | Nyctophilus gouldi       | 20          |
| 2 | Jarrah Forest | Nyctophilus gouldi       | 91          |
| 2 | Jarrah Forest | Nyctophilus gouldi       | 111         |
| 2 | Jarrah Forest | Nyctophilus gouldi       | 115         |
| 2 | Jarrah Forest | Nyctophilus gouldi       | 117         |
| 2 | Jarrah Forest | Nyctophilus gouldi       | 145         |
| 2 | Jarrah Forest | Nyctophilus gouldi       | 149         |
| 2 | Jarrah Forest | Nyctophilus gouldi       | 184         |
| 2 | Jarrah Forest | Nyctophilus gouldi       | 184         |
| 2 | Jarrah Forest | Nyctophilus gouldi       | 189         |
| 2 | Jarrah Forest | Nyctophilus gouldi       | 209         |
| 2 | Jarrah Forest | Nyctophilus gouldi       | 212         |
| 2 | Jarrah Forest | Nyctophilus gouldi       | 213         |
| 2 | Jarrah Forest | Nyctophilus gouldi       | 222         |
| 2 | Jarrah Forest | Nyctophilus gouldi       | 223         |
| 2 | Jarrah Forest | Nyctophilus gouldi       | 238         |
| 2 | Jarrah Forest | Nyctophilus gouldi       | 239         |
| 2 | Jarrah Forest | Nyctophilus gouldi       | 242         |
| 2 | Jarrah Forest | Nyctophilus gouldi       | 245         |
| 2 | Jarrah Forest | Nyctophilus gouldi       | 248         |
| 2 | Jarrah Forest | Nyctophilus gouldi       | 250         |
| 2 | Jarrah Forest | Nyctophilus gouldi       | 266         |
| 2 | Jarrah Forest | Nyctophilus gouldi       | 274         |
| 2 | Jarrah Forest | Nyctophilus gouldi       | 276         |
| 2 | Jarrah Forest | Nyctophilus gouldi       | 288         |
| 2 | Jarrah Forest | Nyctophilus gouldi       | 288         |
| 2 | Jarrah Forest | Nyctophilus gouldi       | 292         |
| 2 | Jarrah Forest | Nyctophilus gouldi       | 292         |
| 2 | Jarrah Forest | Nyctophilus gouldi       | 292         |
| 2 | Jarrah Forest | Nyctophilus gouldi       | 311         |
| 2 | Jarrah Forest | Nyctophilus gouldi       | 321         |
| 2 | Jarrah Forest | Nyctophilus gouldi       | 350         |
| 2 | Jarrah Forest | Nyctophilus gouldi       | 356         |
| 2 | Jarrah Forest | Nyctophilus gouldi       | 360         |
| 2 | Jarrah Forest | Nyctophilus gouldi       | 374         |

|   |               |                    |             |
|---|---------------|--------------------|-------------|
| 2 | Jarrah Forest | Nyctophilus gouldi | 382         |
| 2 | Jarrah Forest | Nyctophilus gouldi | 387         |
| 2 | Jarrah Forest | Nyctophilus gouldi | 389         |
| 2 | Jarrah Forest | Nyctophilus gouldi | 396         |
| 2 | Jarrah Forest | Nyctophilus gouldi | 400         |
| 2 | Jarrah Forest | Nyctophilus gouldi | 420         |
| 2 | Jarrah Forest | Nyctophilus gouldi | 440         |
| 2 | Jarrah Forest | Nyctophilus gouldi | 464         |
| 2 | Jarrah Forest | Nyctophilus gouldi | 540         |
| 2 | Jarrah Forest | Nyctophilus gouldi | 540         |
| 2 | Jarrah Forest | Nyctophilus gouldi | 563         |
| 2 | Jarrah Forest | Nyctophilus gouldi | 663         |
| 2 | Jarrah Forest | Nyctophilus gouldi | 735         |
| 2 | Jarrah Forest | Nyctophilus gouldi | 976         |
| 2 | Jarrah Forest | Nyctophilus gouldi | <b>1950</b> |
| 2 | Jarrah Forest | Nyctophilus gouldi | NA          |
| 2 | Jarrah Forest | Nyctophilus gouldi | NA          |
| 2 | Jarrah Forest | Nyctophilus gouldi | NA          |
| 2 | Jarrah Forest | Nyctophilus major  | 91          |
| 2 | Jarrah Forest | Nyctophilus major  | 218         |
| 2 | Jarrah Forest | Nyctophilus major  | <b>1416</b> |
| 2 | Jarrah Forest | Nyctophilus sp     | 133         |
| 2 | Jarrah Forest | Nyctophilus sp     | 146         |
| 2 | Jarrah Forest | Nyctophilus sp     | 149         |
| 2 | Jarrah Forest | Vespadelus regulus | 25          |
| 2 | Jarrah Forest | Vespadelus regulus | 60          |
| 2 | Jarrah Forest | Vespadelus regulus | 65          |
| 2 | Jarrah Forest | Vespadelus regulus | 90          |
| 2 | Jarrah Forest | Vespadelus regulus | 107         |
| 2 | Jarrah Forest | Vespadelus regulus | 110         |
| 2 | Jarrah Forest | Vespadelus regulus | 111         |
| 2 | Jarrah Forest | Vespadelus regulus | 116         |
| 2 | Jarrah Forest | Vespadelus regulus | 118         |
| 2 | Jarrah Forest | Vespadelus regulus | 121         |
| 2 | Jarrah Forest | Vespadelus regulus | 123         |
| 2 | Jarrah Forest | Vespadelus regulus | 123         |
| 2 | Jarrah Forest | Vespadelus regulus | 124         |
| 2 | Jarrah Forest | Vespadelus regulus | 125         |
| 2 | Jarrah Forest | Vespadelus regulus | 126         |
| 2 | Jarrah Forest | Vespadelus regulus | 130         |
| 2 | Jarrah Forest | Vespadelus regulus | 133         |
| 2 | Jarrah Forest | Vespadelus regulus | 134         |
| 2 | Jarrah Forest | Vespadelus regulus | 134         |
| 2 | Jarrah Forest | Vespadelus regulus | 136         |
| 2 | Jarrah Forest | Vespadelus regulus | 137         |
| 2 | Jarrah Forest | Vespadelus regulus | 137         |
| 2 | Jarrah Forest | Vespadelus regulus | 137         |
| 2 | Jarrah Forest | Vespadelus regulus | 142         |
| 2 | Jarrah Forest | Vespadelus regulus | 146         |
| 2 | Jarrah Forest | Vespadelus regulus | 150         |
| 2 | Jarrah Forest | Vespadelus regulus | 154         |
| 2 | Jarrah Forest | Vespadelus regulus | 156         |
| 2 | Jarrah Forest | Vespadelus regulus | 160         |
| 2 | Jarrah Forest | Vespadelus regulus | 161         |
| 2 | Jarrah Forest | Vespadelus regulus | 162         |
| 2 | Jarrah Forest | Vespadelus regulus | 162         |
| 2 | Jarrah Forest | Vespadelus regulus | 170         |
| 2 | Jarrah Forest | Vespadelus regulus | 172         |
| 2 | Jarrah Forest | Vespadelus regulus | 178         |
| 2 | Jarrah Forest | Vespadelus regulus | 186         |
| 2 | Jarrah Forest | Vespadelus regulus | 187         |
| 2 | Jarrah Forest | Vespadelus regulus | 190         |
| 2 | Jarrah Forest | Vespadelus regulus | 194         |
| 2 | Jarrah Forest | Vespadelus regulus | 194         |
| 2 | Jarrah Forest | Vespadelus regulus | 201         |
| 2 | Jarrah Forest | Vespadelus regulus | 202         |
| 2 | Jarrah Forest | Vespadelus regulus | 202         |

|   |                    |                      |             |
|---|--------------------|----------------------|-------------|
| 2 | Jarrah Forest      | Vespadelus regulus   | 204         |
| 2 | Jarrah Forest      | Vespadelus regulus   | 207         |
| 2 | Jarrah Forest      | Vespadelus regulus   | 207         |
| 2 | Jarrah Forest      | Vespadelus regulus   | 216         |
| 2 | Jarrah Forest      | Vespadelus regulus   | 225         |
| 2 | Jarrah Forest      | Vespadelus regulus   | 236         |
| 2 | Jarrah Forest      | Vespadelus regulus   | 241         |
| 2 | Jarrah Forest      | Vespadelus regulus   | 241         |
| 2 | Jarrah Forest      | Vespadelus regulus   | 250         |
| 2 | Jarrah Forest      | Vespadelus regulus   | 253         |
| 2 | Jarrah Forest      | Vespadelus regulus   | 258         |
| 2 | Jarrah Forest      | Vespadelus regulus   | 261         |
| 2 | Jarrah Forest      | Vespadelus regulus   | 262         |
| 2 | Jarrah Forest      | Vespadelus regulus   | 262         |
| 2 | Jarrah Forest      | Vespadelus regulus   | 263         |
| 2 | Jarrah Forest      | Vespadelus regulus   | 266         |
| 2 | Jarrah Forest      | Vespadelus regulus   | 266         |
| 2 | Jarrah Forest      | Vespadelus regulus   | 272         |
| 2 | Jarrah Forest      | Vespadelus regulus   | 276         |
| 2 | Jarrah Forest      | Vespadelus regulus   | 279         |
| 2 | Jarrah Forest      | Vespadelus regulus   | 282         |
| 2 | Jarrah Forest      | Vespadelus regulus   | 283         |
| 2 | Jarrah Forest      | Vespadelus regulus   | 285         |
| 2 | Jarrah Forest      | Vespadelus regulus   | 287         |
| 2 | Jarrah Forest      | Vespadelus regulus   | 293         |
| 2 | Jarrah Forest      | Vespadelus regulus   | 300         |
| 2 | Jarrah Forest      | Vespadelus regulus   | 329         |
| 2 | Jarrah Forest      | Vespadelus regulus   | 340         |
| 2 | Jarrah Forest      | Vespadelus regulus   | 347         |
| 2 | Jarrah Forest      | Vespadelus regulus   | 356         |
| 2 | Jarrah Forest      | Vespadelus regulus   | 356         |
| 2 | Jarrah Forest      | Vespadelus regulus   | 364         |
| 2 | Jarrah Forest      | Vespadelus regulus   | 368         |
| 2 | Jarrah Forest      | Vespadelus regulus   | 398         |
| 2 | Jarrah Forest      | Vespadelus regulus   | 401         |
| 2 | Jarrah Forest      | Vespadelus regulus   | 406         |
| 2 | Jarrah Forest      | Vespadelus regulus   | 427         |
| 2 | Jarrah Forest      | Vespadelus regulus   | 430         |
| 2 | Jarrah Forest      | Vespadelus regulus   | 453         |
| 2 | Jarrah Forest      | Vespadelus regulus   | 457         |
| 2 | Jarrah Forest      | Vespadelus regulus   | 460         |
| 2 | Jarrah Forest      | Vespadelus regulus   | 472         |
| 2 | Jarrah Forest      | Vespadelus regulus   | 573         |
| 2 | Jarrah Forest      | Vespadelus regulus   | 595         |
| 2 | Jarrah Forest      | Vespadelus regulus   | 606         |
| 2 | Jarrah Forest      | Vespadelus regulus   | 616         |
| 2 | Jarrah Forest      | Vespadelus regulus   | 643         |
| 2 | Jarrah Forest      | Vespadelus regulus   | 717         |
| 2 | Jarrah Forest      | Vespadelus regulus   | 745         |
| 2 | Jarrah Forest      | Vespadelus regulus   | 813         |
| 2 | Jarrah Forest      | Vespadelus regulus   | 848         |
| 2 | Jarrah Forest      | Vespadelus regulus   | 947         |
| 2 | Jarrah Forest      | Vespadelus regulus   | <b>1115</b> |
| 2 | Jarrah Forest      | Vespadelus regulus   | <b>1128</b> |
| 2 | Jarrah Forest      | Vespadelus regulus   | <b>1149</b> |
| 2 | Jarrah Forest      | Vespadelus regulus   | <b>1818</b> |
| 2 | Jarrah Forest      | Vespadelus regulus   | NA          |
| 2 | Jarrah Forest      | Vespadelus regulus   | NA          |
| 2 | Jarrah Forest      | Vespadelus sp        | 517         |
| 2 | Swan Coastal Plain | Chalinolobus gouldii | 179         |
| 2 | Swan Coastal Plain | Chalinolobus gouldii | 247         |
| 2 | Warren             | Chalinolobus morio   | 182         |
| 2 | Warren             | Chalinolobus morio   | 204         |
| 2 | Warren             | Chalinolobus morio   | 242         |
| 2 | Warren             | Chalinolobus morio   | 261         |
| 2 | Warren             | Chalinolobus morio   | 281         |
| 2 | Warren             | Chalinolobus morio   | 333         |

|   |        |                          |             |
|---|--------|--------------------------|-------------|
| 2 | Warren | Chalinolobus morio       | 356         |
| 2 | Warren | Chalinolobus morio       | 359         |
| 2 | Warren | Chalinolobus morio       | 369         |
| 2 | Warren | Chalinolobus morio       | 375         |
| 2 | Warren | Chalinolobus morio       | 386         |
| 2 | Warren | Chalinolobus morio       | 388         |
| 2 | Warren | Chalinolobus morio       | 395         |
| 2 | Warren | Chalinolobus morio       | 397         |
| 2 | Warren | Chalinolobus morio       | 419         |
| 2 | Warren | Chalinolobus morio       | 447         |
| 2 | Warren | Chalinolobus morio       | 452         |
| 2 | Warren | Chalinolobus morio       | 582         |
| 2 | Warren | Chalinolobus morio       | 724         |
| 2 | Warren | Chalinolobus morio       | 753         |
| 2 | Warren | Chalinolobus morio       | <b>1166</b> |
| 2 | Warren | Chalinolobus morio       | <b>1645</b> |
| 2 | Warren | Chalinolobus morio       | <b>2602</b> |
| 2 | Warren | Chalinolobus morio       | NA          |
| 2 | Warren | Chalinolobus morio       | NA          |
| 2 | Warren | Falsistrellus mackenziei | 928         |
| 2 | Warren | Nyctophilus geoffroyi    | 223         |
| 2 | Warren | Nyctophilus geoffroyi    | 447         |
| 2 | Warren | Nyctophilus gouldi       | 138         |
| 2 | Warren | Nyctophilus gouldi       | 233         |
| 2 | Warren | Nyctophilus gouldi       | 249         |
| 2 | Warren | Nyctophilus gouldi       | 280         |
| 2 | Warren | Nyctophilus gouldi       | 285         |
| 2 | Warren | Nyctophilus gouldi       | 309         |
| 2 | Warren | Nyctophilus gouldi       | 334         |
| 2 | Warren | Nyctophilus gouldi       | 348         |
| 2 | Warren | Nyctophilus gouldi       | 358         |
| 2 | Warren | Nyctophilus gouldi       | 403         |
| 2 | Warren | Nyctophilus gouldi       | 694         |
| 2 | Warren | Nyctophilus gouldi       | 783         |
| 2 | Warren | Nyctophilus gouldi       | 884         |
| 2 | Warren | Nyctophilus gouldi       | <b>1229</b> |
| 2 | Warren | Nyctophilus gouldi       | <b>1544</b> |
| 2 | Warren | Nyctophilus major        | 258         |
| 2 | Warren | Nyctophilus sp           | 273         |
| 2 | Warren | Vespadelus regulus       | 0           |
| 2 | Warren | Vespadelus regulus       | 167         |
| 2 | Warren | Vespadelus regulus       | 192         |
| 2 | Warren | Vespadelus regulus       | 207         |
| 2 | Warren | Vespadelus regulus       | 213         |
| 2 | Warren | Vespadelus regulus       | 226         |
| 2 | Warren | Vespadelus regulus       | 235         |
| 2 | Warren | Vespadelus regulus       | 238         |
| 2 | Warren | Vespadelus regulus       | 243         |
| 2 | Warren | Vespadelus regulus       | 250         |
| 2 | Warren | Vespadelus regulus       | 257         |
| 2 | Warren | Vespadelus regulus       | 264         |
| 2 | Warren | Vespadelus regulus       | 274         |
| 2 | Warren | Vespadelus regulus       | 292         |
| 2 | Warren | Vespadelus regulus       | 295         |
| 2 | Warren | Vespadelus regulus       | 295         |
| 2 | Warren | Vespadelus regulus       | 300         |
| 2 | Warren | Vespadelus regulus       | 301         |
| 2 | Warren | Vespadelus regulus       | 308         |
| 2 | Warren | Vespadelus regulus       | 310         |
| 2 | Warren | Vespadelus regulus       | 318         |
| 2 | Warren | Vespadelus regulus       | 320         |
| 2 | Warren | Vespadelus regulus       | 320         |
| 2 | Warren | Vespadelus regulus       | 342         |
| 2 | Warren | Vespadelus regulus       | 351         |
| 2 | Warren | Vespadelus regulus       | 358         |
| 2 | Warren | Vespadelus regulus       | 358         |
| 2 | Warren | Vespadelus regulus       | 392         |

|   |        |                    |             |
|---|--------|--------------------|-------------|
| 2 | Warren | Vespadelus regulus | 393         |
| 2 | Warren | Vespadelus regulus | 421         |
| 2 | Warren | Vespadelus regulus | 431         |
| 2 | Warren | Vespadelus regulus | 462         |
| 2 | Warren | Vespadelus regulus | 464         |
| 2 | Warren | Vespadelus regulus | 497         |
| 2 | Warren | Vespadelus regulus | 849         |
| 2 | Warren | Vespadelus regulus | <b>1026</b> |
| 2 | Warren | Vespadelus regulus | <b>1054</b> |
| 2 | Warren | Vespadelus regulus | <b>1187</b> |
| 2 | Warren | Vespadelus regulus | <b>1192</b> |
| 2 | Warren | Vespadelus regulus | <b>2678</b> |
| 2 | Warren | Vespadelus regulus | NA          |

---

\*Samples collected at either the Jarrah Forest or the Swan Coastal Plain Bioregions

NA, assay failed.
